# Supplementary material for: An organic polarized photonic heterostructure based on tetra(4-pyridylphenyl)ethylene
Source: Royal Society of Chemistry journal article supplement (doi:10.1039/d4cc04345f), 2024-01-01
Supplement: d4cc04345f1.pdf [file d4cc04345f1.pdf]

Electronic Supplementary Information (ESI) for:

**Organic polarized photonic heterostructure based on  
tetra(4-pyridylphenyl)ethylene**

Li Meng,<sup>a,b</sup> Zhong-Qiu Li,<sup>b</sup> Jiang-Yang Shao,<sup>b</sup> Zili Chen,<sup>\*a</sup> Yu-Wu Zhong<sup>\*b,c</sup>

---

<sup>a</sup>*School of Chemistry and Life Resources, Renmin University of China, 59# Zhongguancun Street, Haidian District, Beijing 100872, China. Email: zilichen@ruc.edu.cn (Z.C.)*

<sup>b</sup>*Beijing National Laboratory for Molecular Sciences, CAS Key Laboratory of Photochemistry, CAS Research/Education Center for Excellence in Molecular Sciences, Institute of Chemistry, Chinese Academy of Sciences, 2 Bei Yi Jie, Zhong Guan Cun, Haidian District, Beijing 100190, China. Email: zhongyuwu@iccas.ac.cn (Y.-W.Z.)*

<sup>c</sup>*School of Chemical Sciences, University of Chinese Academy of Sciences, No.19(A) Yuquan Road, Shijingshan District, Beijing 100049, China.*

### **Instrumental information for physical measurements**

The UV-vis absorption spectra were recorded at rt on the TU-1810DSPC spectrometer from Beijing Purkinje General Instrument Co., Ltd. The photoluminescence spectra were obtained at rt with the F-380 spectrofluorimeter from Tianjin Gangdong Sci. & Tech. Development Co., Ltd. The absolute fluorescence quantum yields were determined using the Hamamatsu Absolute PL Quantum Yield Spectrometer C11347 with the aid of an integrating sphere. Hamamatsu C11367-11 instrument with single photon counting were employed to obtain the excited-state lifetimes. The morphologies of microstructures were investigated by SEM on the Hitachi SU8010 instrument at 10 kV. Rigaku Saturn 724 diffractometer was used to perform the single-crystal X-ray analysis at 173 K on a rotating anode (Cu K $\alpha$ ;  $\lambda$  = 1.54184 Å). The structures were solved with SHELXS-97 and refined on Olex2. The powder X-ray diffractions (PXRD) were carried out on the Rigaku D/max-2500 instrument (Cu K $\alpha$ ;  $\lambda$  = 1.54 Å). Fluorescence microscopy characterization was performed on the Olympus IX83 Inverted fluorescence microscope by the UV irradiation at 330-385 nm.

### **Calculation method on transition dipole moment**

The electronic structures of TPPE were first optimized with the Gaussian 09 program package by density functional theory (DFT) calculations with B3LYP/6-31G\*. Time-dependent density functional theory (TDDFT) calculations were further performed to get the excited-state information. The obtained fchk files were analysed by the Multiwfn multifunctional wavefunction analyzer to obtain the dipole moment information.<sup>1</sup>

**General information.** Compounds TPPE is prepared according to literature studies.<sup>2</sup>

**Preparation of yellow-blue-yellow triblock heterojunction.** The middle part of the rod-like crystals of TPPE (50-100  $\mu\text{m}$  in length) was firstly covered with the

commercial glue. After about 5 min at rt, the glue became solidified. The crystal was then exposed to the HCl vapor for 1 min. During this process, the uncovered segments of the crystal turn yellow-emissive, while the covered segments remain blue-emissive, leading to the yellow-blue-yellow triblock heterostructure.

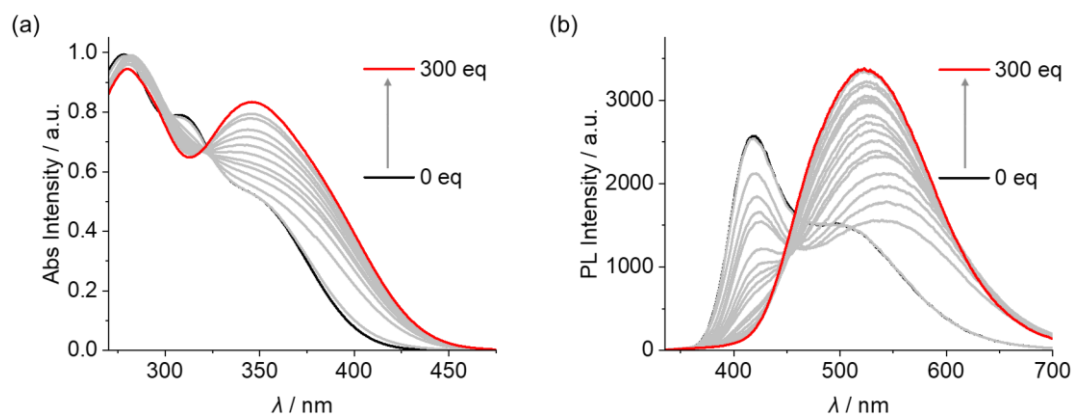

**Fig. S1** (a) Absorption and (b) photoluminescence (PL) spectral changes of TPPE upon the treatment of HCl in DMF ( $1 \times 10^{-5}$  M).

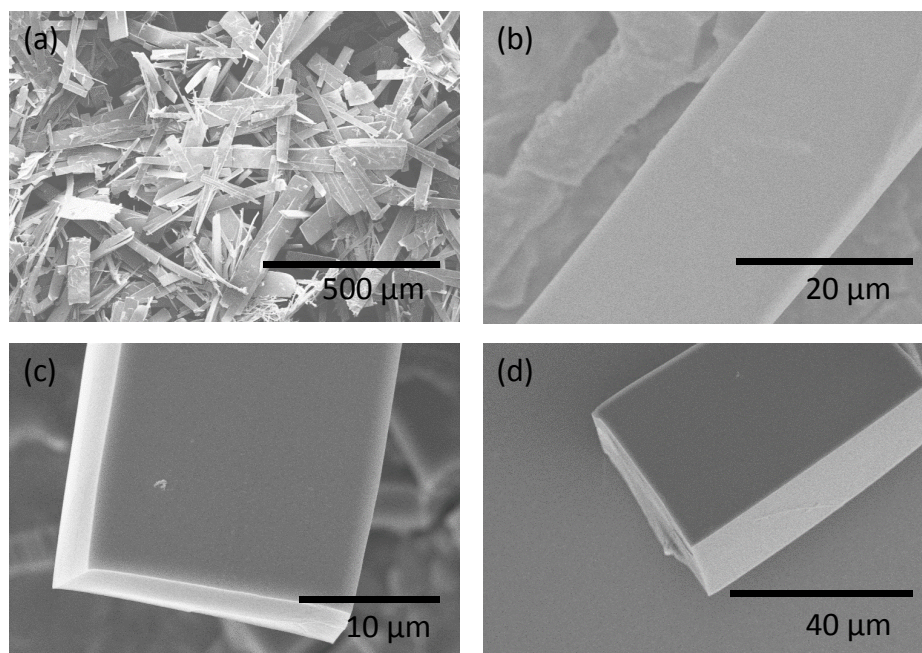

**Fig. S2** Scanning electron microscopy (SEM) images of the blue-emissive crystals of TPPE.

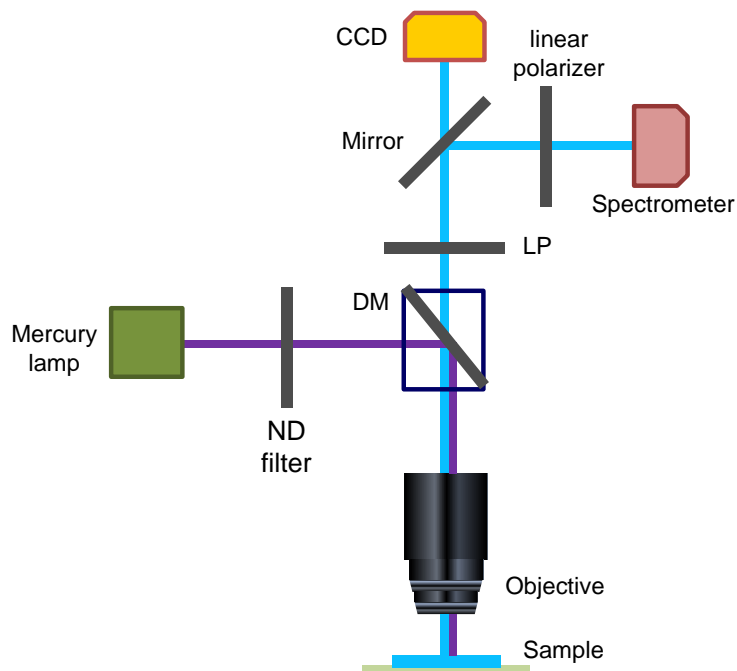

**Fig. S3** The home-made setup for the LPL measurement.<sup>3</sup> The crystals were excited by the mercury lamp altered by a neutral density (ND) filter. The photoluminescence signal was collected by the microscope objective (Olympus M Plan,  $\times 20$ , N.A. =0.4), passed through the dichroic mirror (DM). By rotating the linear polarizer in front of the detector, the polarization of the light signal can be obtained and recorded with a thermoelectric-cooled PIXIS 256BR CCD and analyzed by the Princeton Instrument HRS-300S spectrometer on the photoexcited plane exposed on the substrate.

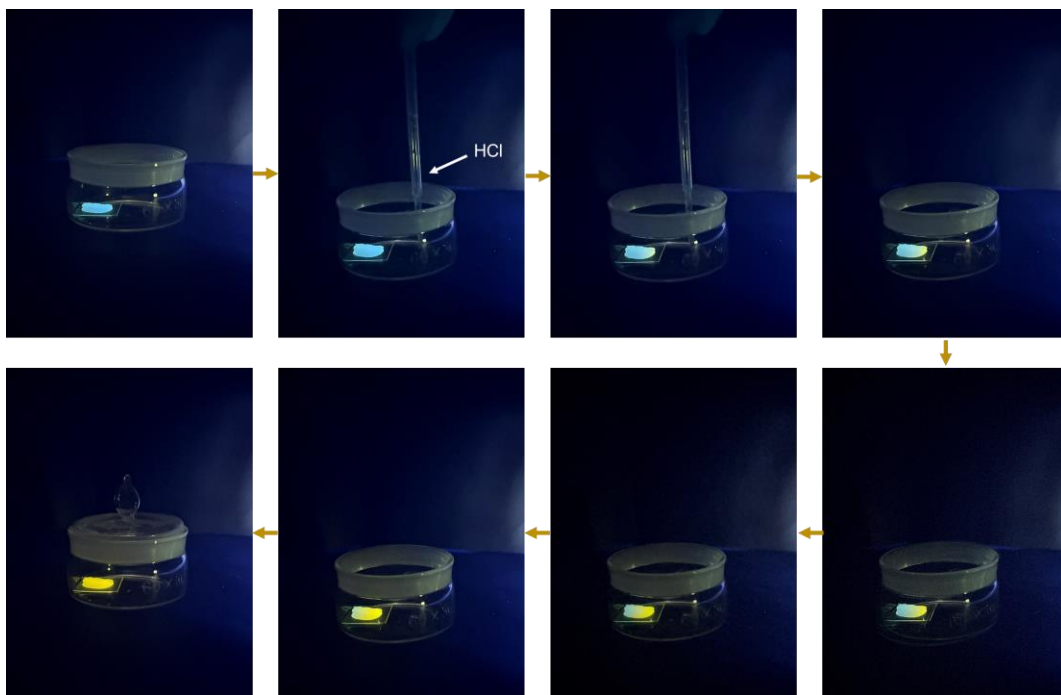

**Fig. S4** The protonation procedure of TPPE to give TPPE-H.

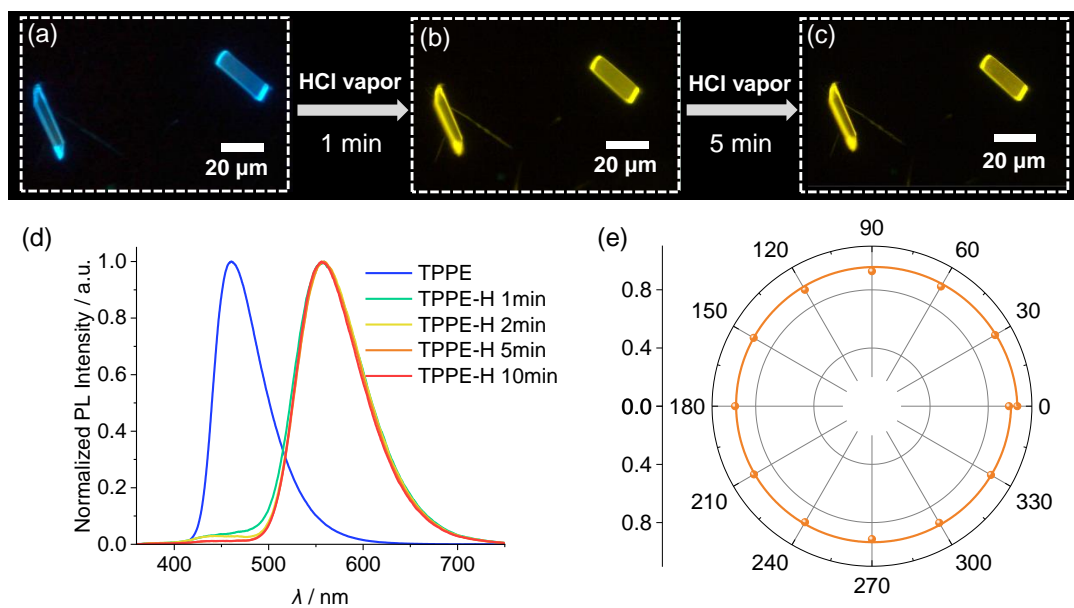

**Fig. S5** (a-c) Fluorescence microscopy changes of TPPE microcrystals upon the treatment with HCl vapor. (d) PL spectra of microcrystals of TPPE and TPPE-H (obtained after treatment with HCl vapor for 1, 2, 5, 10 min). (e) Relevant photoluminescence polarization profile of TPPE-H (5 min).



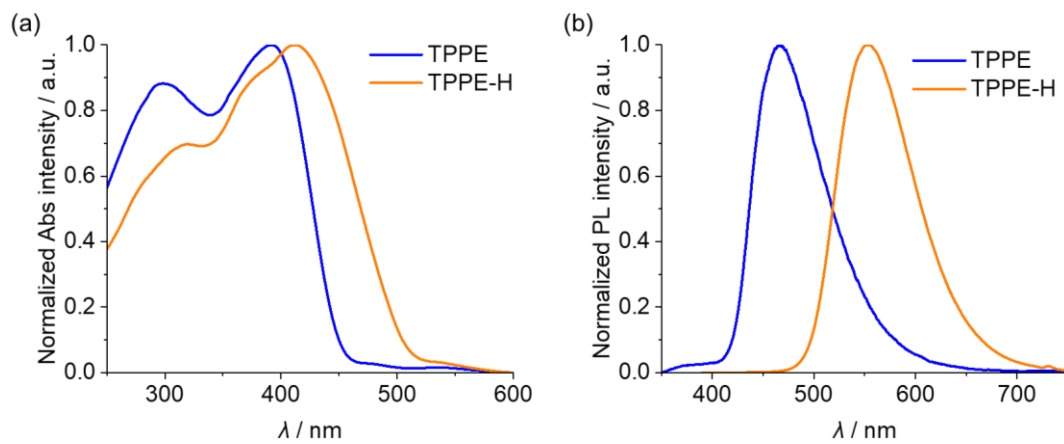

**Fig. S6** (a) Absorption and (b) photoluminescence (PL) spectra of the microcrystals of TPPE and TPPE-H.

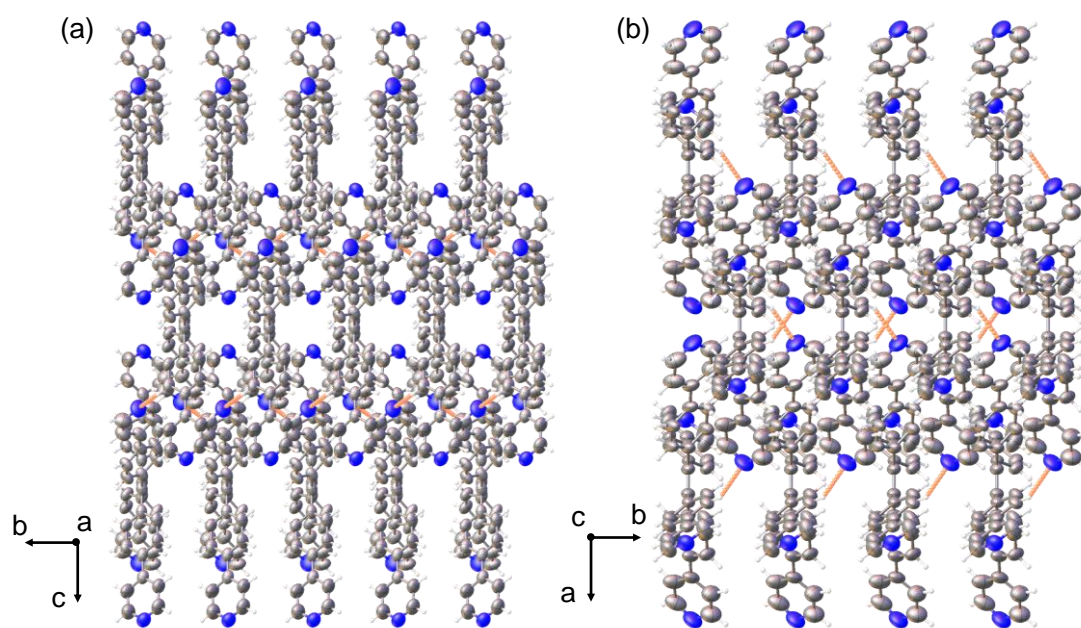

**Fig. S7** Single-crystal molecular packing structure of TPPE crystal viewed from (a) crystallographic *a* axis and (b) from *c* axis, respectively. The orange lines indicate the hydrogen bondings with a N...H distance of 2.455 Å.

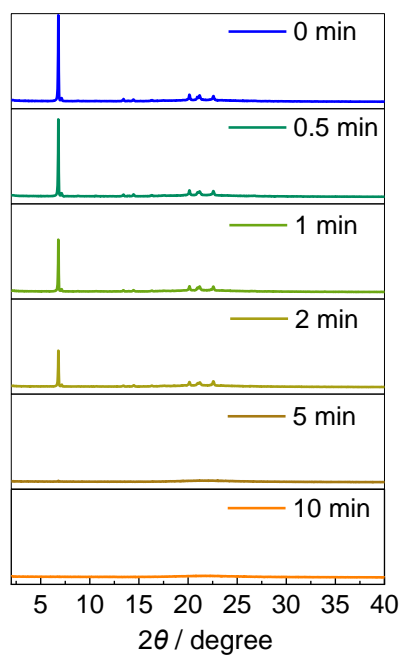

**Fig. S8** In-situ PXRD spectral changes of the TPPE microcrystals (0 min) upon treating with HCl gas for 0.5 min, 1 min, 2 min, 5 min, and 10 min, respectively.

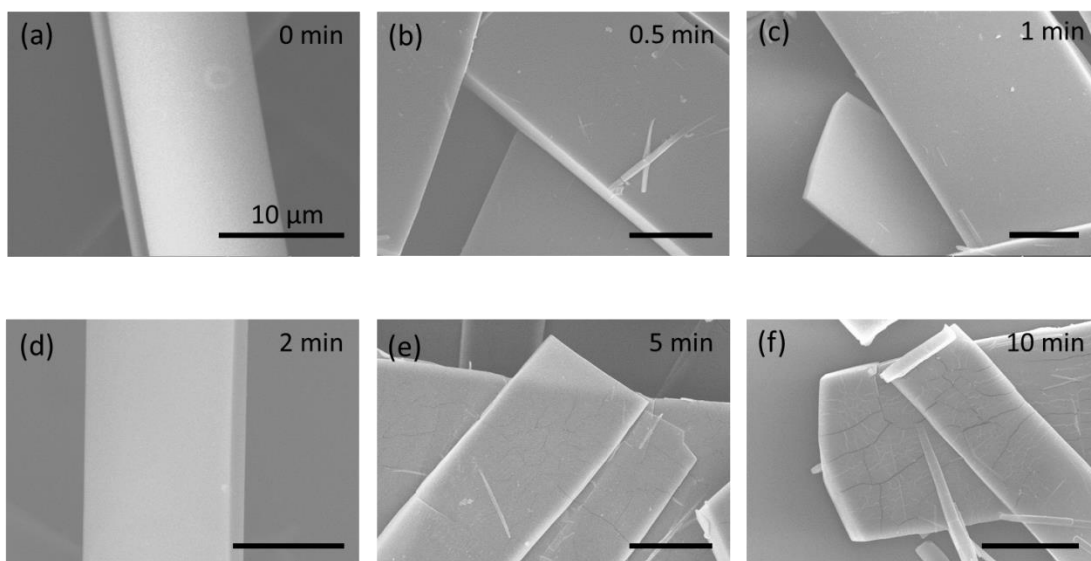

**Fig. S9** SEM images of (a) TPPE microcrystals and (b-f) TPPE-H crystals obtained from TPPE crystals after treating with HCl gas for 0.5 min, 1 min, 2 min, 5 min, and 10 min, respectively.

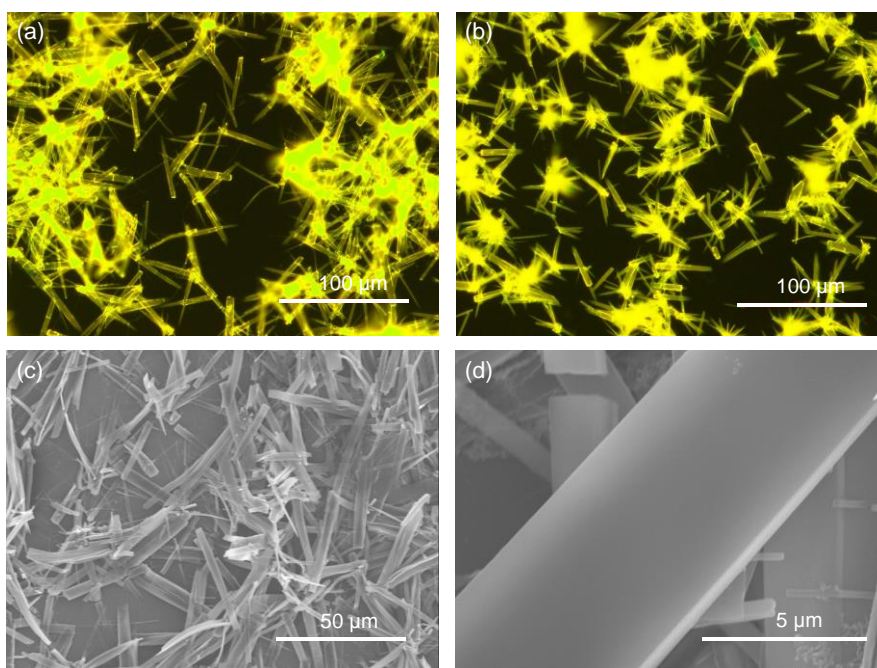

**Fig. S10** (a,b) Fluorescence microscopy images of TPPE-H microcrystals after (a) vacuum treatment for 24 h or (b) keeping at room temperature for 7 days. (c,d) SEM images of TPPE-H microcrystals after vacuum treatment for 24 h.

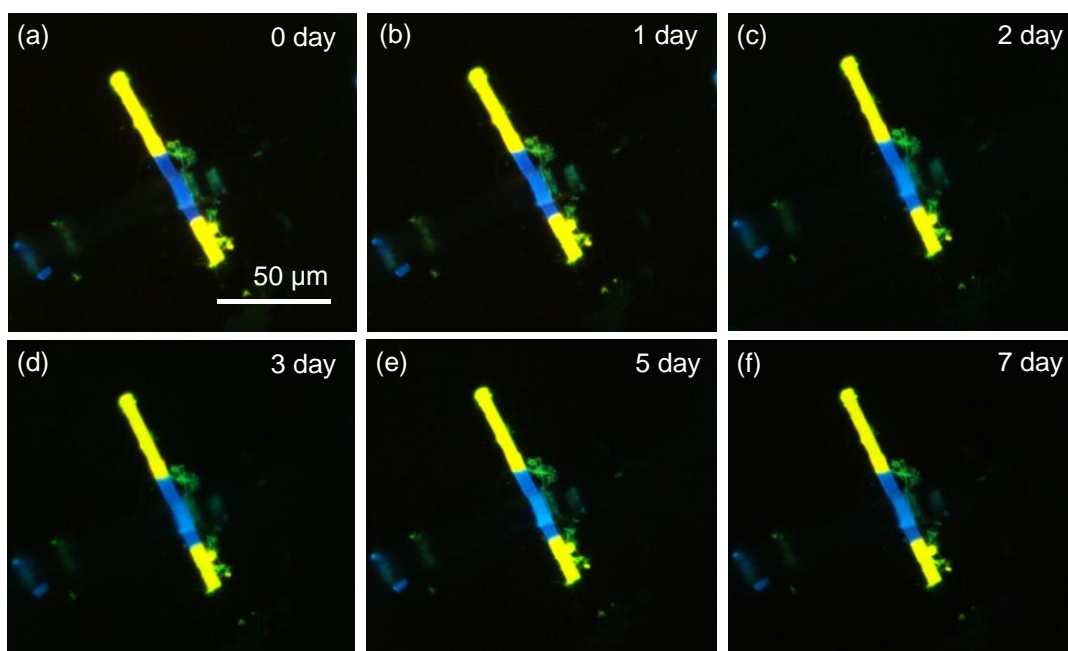

**Fig. S11** (a-f) Fluorescence microscopy images of TPPE-H microcrystals after keeping at room temperature for 7 days.

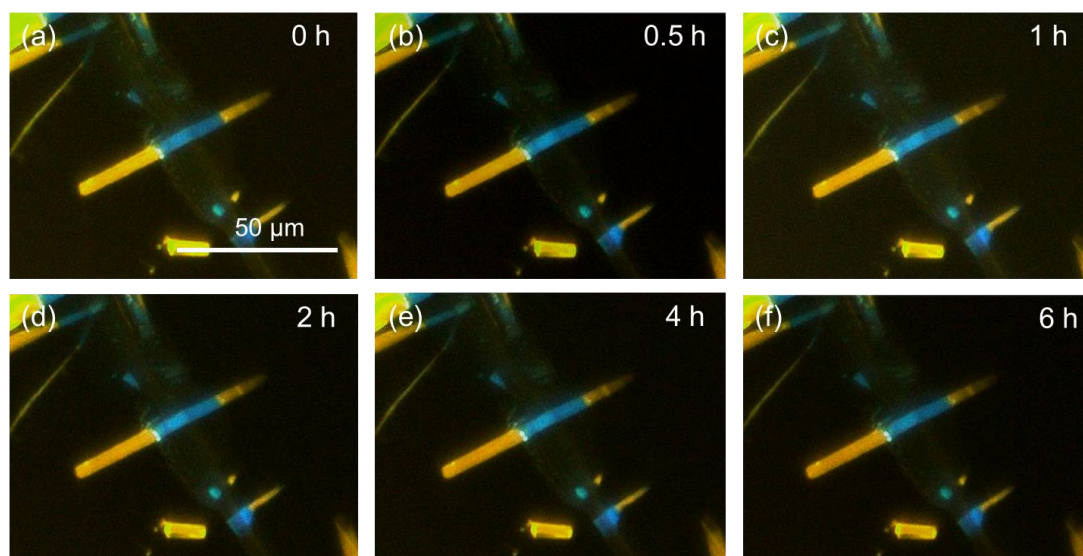

**Fig. S12** (a-f) Fluorescence microscopy images of TPPE-H microcrystals after heating at 100 °C for 6 h.

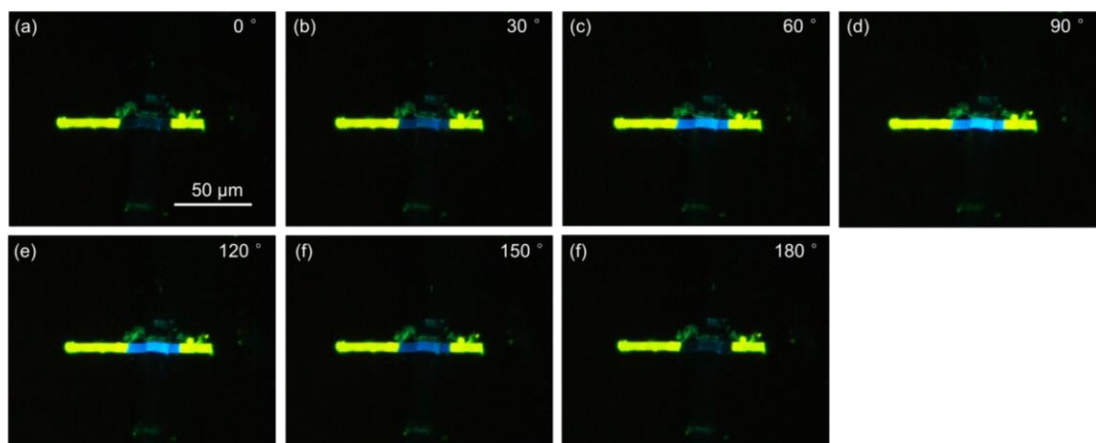

**Fig. S13** (a,f) Fluorescence microscopy images recorded during the angle-resolved polarized luminescence measurement under UV excitation of the triblock heterostructure after 7 days of storage at room temperature. The indicated degrees refer to the angle between the linear polarizer relative to the crystal orientation.



**Table S1** Photophysics data of TPPE and TPPE-H micrycrystals.

| crystals | $\lambda_{\text{ex}}/\text{nm}^{\text{a}}$ | $\lambda_{\text{em,max}}/\text{nm}$ | $\tau/\text{ns}$ | $\Phi_{\text{FL}}/\%^{\text{b}}$ |
|----------|--------------------------------------------|-------------------------------------|------------------|----------------------------------|
| TPPE     | 300                                        | 470                                 | 1.43             | 43.9                             |
| TPPE-H   | 365                                        | 554                                 | 3.81             | 77.1                             |

<sup>a</sup>Excitation wavelength. <sup>b</sup>Absolute emission yield.

**Table S2** Crystallographic data and parameters.

| compound                     | TPPE                                           |
|------------------------------|------------------------------------------------|
| CCDC number                  | 2257690                                        |
| empirical formula            | C <sub>46</sub> H <sub>32</sub> N <sub>4</sub> |
| formula weight               | 640.75                                         |
| Temperature (K)              | 170.15                                         |
| crystal system               | monoclinic                                     |
| Space group                  | <i>I</i> 2                                     |
| a (Å)                        | 16.6067(7)                                     |
| b (Å)                        | 5.4254(3)                                      |
| c (Å)                        | 20.6546(10)                                    |
| α (°)                        | 90                                             |
| β (°)                        | 93.326(4)                                      |
| γ (°)                        | 90                                             |
| V (Å <sup>3</sup> )          | 1857.79(15)                                    |
| Z value                      | 2                                              |
| Density (g/cm <sup>3</sup> ) | 1.145                                          |
| R1 (final)                   | 0.0740                                         |
| wR2 (final)                  | 0.2158                                         |
| R1 (all)                     | 0.0991                                         |
| wR2 (all)                    | 0.2447                                         |

## References

1. T. Lu and F. Chen, *J. Comput. Chem.*, 2012, **33**, 580-592.
2. C. Mu, Z. Zhang, Y. Hou, H. Liu, L. Ma, X. Li, S. Ling, G. He and M. Zhang, *Angew. Chem., Int. Ed.*, 2021, **60**, 12293-12297.
3. Z.-Q. Li, D.-X. Ma, F.-F. Xu, T.-X. Dan, Z.-L. Gong, J.-Y. Shao, Y. S. Zhao, J. Yao and Y.-W. Zhong, *Angew. Chem., Int. Ed.*, 2022, **61**, e202205033.
